# Supplementary material for: Differences in mortality between temporary and permanent workers: results from the Rome Longitudinal Study
Source: HighWire-hosted journal article supplement (doi:10.1136/bmjopen-2021-058594), 2022-05-01
Supplement: bmjopen-2021-058594supp001_data_supplement.pdf [file bmjopen-2021-058594supp001_data_supplement.pdf]

## Supplemental Material

### Differences in mortality between temporary and permanent workers: results from the Rome Longitudinal Study.

#### Authors

Angelo Nardi, Health District 2, ASL Roma 1, Rome, Italy; Sapienza University, Rome, Italy

Luca Dei Bardi, Department of Epidemiology-Regional Health Service, ASL Roma 1, Rome, Italy;  
Sapienza University, Rome, Italy

Marina Davoli, Department of Epidemiology-Regional Health Service, ASL Roma 1, Rome, Italy

Nera Agabiti, Department of Epidemiology-Regional Health Service, ASL Roma 1, Rome, Italy

Giulia Cesaroni, Department of Epidemiology-Regional Health Service, ASL Roma 1, Rome, Italy

**Supplementary Table 1. Characteristics by occupational sector in men, Rome 2001.**

| Men                                                       | N       | Contract (%<br>Temporary) | Education<br>(% High) | Place of birth<br>(% Abroad) | Age<br>mean (sd) | Number<br>of deaths | % CV<br>deaths | % AC<br>deaths |
|-----------------------------------------------------------|---------|---------------------------|-----------------------|------------------------------|------------------|---------------------|----------------|----------------|
| <b>Fishing and agriculture</b>                            | 3,927   | 14.7                      | 7.6                   | 9.8                          | 43.7 (10.9)      | 271                 | 24.7           | 7.0            |
| Agriculture, hunting, forestry                            | 3620    | 14.9                      | 7.5                   | 9.6                          | 44.0 (10.9)      | 250                 | 26.0           | 6.8            |
| Fishing, fish farming                                     | 307     | 12.4                      | 8.1                   | 11.4                         | 40.9 (10.6)      | 21                  | 9.5*           | 9.5*           |
| <b>Industry</b>                                           | 44,568  | 9.7                       | 18.2                  | 4.8                          | 42 (9.9)         | 1,897               | 26.5           | 6.9            |
| Coal mining, oil extraction                               | 1,829   | 6.2                       | 29.3                  | 4.6                          | 45.7 (10)        | 86                  | 24.4           | 4.7*           |
| Food industry                                             | 3,979   | 10.0                      | 12.0                  | 5.2                          | 41.7 (9.9)       | 171                 | 26.9           | 7.6            |
| Textile, leather industry                                 | 2,035   | 14.3                      | 9.0                   | 7.4                          | 41.3 (10.5)      | 107                 | 33.6           | 4.7*           |
| Wood, wood products industry. publishing                  | 5,174   | 9.5                       | 9.2                   | 3.6                          | 42.2 (9.5)       | 225                 | 28.0           | 4.4            |
| Refinery, pharmaceutical, chemical industry               | 5,959   | 8.8                       | 35.1                  | 4.9                          | 42.5 (9.8)       | 211                 | 25.1           | 6.6            |
| Non-metal mineral industry                                | 1,348   | 13.8                      | 7.8                   | 7.6                          | 41.5 (10.2)      | 71                  | 38.0           | 5.6*           |
| Steel industry                                            | 17,755  | 10.6                      | 17.8                  | 4.8                          | 41.1 (9.8)       | 728                 | 25.7           | 8.8            |
| Furniture industry                                        | 1,651   | 13.3                      | 6.8                   | 7.6                          | 41.1 (10.8)      | 89                  | 18.0           | 5.6*           |
| Production, distribution of electricity, water and gas    | 4,838   | 4.9                       | 19.6                  | 2.6                          | 44 (9)           | 209                 | 25.4           | 5.3            |
| <b>Building Constructions</b>                             | 21,058  | 14.2                      | 10.2                  | 7.1                          | 41.5 (10.7)      | 1,047               | 27.7           | 8.2            |
| <b>Sales and Transport</b>                                | 79,626  | 11.0                      | 9.4                   | 5.6                          | 41.1 (10.1)      | 3,265               | 26.3           | 6.9            |
| Sale, maintenance, repair of motor vehicles, sale of fuel | 8,449   | 11.6                      | 6.1                   | 4.8                          | 40.3 (10.3)      | 345                 | 22.3           | 5.8            |
| Wholesale trade, intermediaries of trade                  | 7,795   | 11.4                      | 8.4                   | 5.2                          | 39.9 (10)        | 261                 | 25.3           | 6.1            |
| Retail trade                                              | 13,546  | 13.0                      | 5.9                   | 5.1                          | 39.4 (10.4)      | 547                 | 23.8           | 7.3            |
| Hotels, camping, bars, restaurants                        | 13,147  | 13.8                      | 4.8                   | 13.5                         | 39.5 (10.2)      | 561                 | 27.5           | 9.1            |
| Transport                                                 | 36,689  | 9.1                       | 13.4                  | 3.2                          | 42.7 (9.8)       | 1,551               | 27.9           | 6.3            |
| <b>Credit, insurances and other services</b>              | 51,771  | 9.2                       | 32.4                  | 3.1                          | 41 (9.9)         | 1,806               | 26.4           | 4.9            |
| Credit, insurance, monetary, financial intermediation     | 23,179  | 4.6                       | 29.5                  | 2.6                          | 45 (9.3)         | 1,059               | 25.0           | 4.6            |
| IT, research, development                                 | 18,870  | 11.4                      | 35.0                  | 3.0                          | 36.9 (8.6)       | 383                 | 29.8           | 5.7            |
| Professional consulting, real estate, rental              | 9,722   | 15.6                      | 34.1                  | 4.4                          | 39.1 (10.1)      | 364                 | 26.6           | 4.7            |
| <b>Social services</b>                                    | 117,812 | 7.8                       | 29.7                  | 4.2                          | 44.2 (9.9)       | 5,910               | 26.6           | 5.6            |

Supplementary Table 1. *Continued*

|                                           | N      | Contract (%<br>Temporary) | Education<br>(% High) | Place of birth<br>(% Abroad) | Age<br>mean (sd) | Number<br>of deaths | % CV<br>deaths | % AC<br>deaths |
|-------------------------------------------|--------|---------------------------|-----------------------|------------------------------|------------------|---------------------|----------------|----------------|
| Local, national, public administration    | 66,677 | 4.5                       | 21.0                  | 2.7                          | 44 (9.8)         | 3,245               | 27.1           | 5.4            |
| Public, private education                 | 15,276 | 11.6                      | 62.9                  | 4.3                          | 47.3 (9.6)       | 897                 | 25.6           | 4.8            |
| Health, social assistance                 | 19,331 | 8.5                       | 45.7                  | 3.3                          | 44.7 (9.4)       | 1,003               | 27.6           | 6.2            |
| Political, trade union organizations      | 2,404  | 11.9                      | 35.9                  | 3.0                          | 43.9 (10)        | 111                 | 29.7           | 2.7*           |
| Recreational, cultural, sports activities | 5,143  | 27.1                      | 22.8                  | 5.5                          | 41 (10)          | 217                 | 22.6           | 9.7            |
| Other service activities                  | 4,939  | 12.2                      | 5.5                   | 4.9                          | 40.3 (9.8)       | 211                 | 21.8           | 8.5            |
| Domestic services                         | 4,042  | 11.5                      | 4.9                   | 32.1                         | 42.9 (10.1)      | 226                 | 26.1           | 3.5*           |
| <b>International organizations</b>        | 1,892  | 12.2                      | 32.2                  | 20.6                         | 44.7 (9.9)       | 94                  | 27.7           | 7.4*           |

\* Less than 10 deaths

CV cardiovascular

AC accidental

**Supplementary Table 2. Characteristics by occupational sector in women, Rome 2001.**

| Women                                                     | N       | Contract (%<br>Temporary) | Education<br>(% High) | Place of birth<br>(% Abroad) | Age<br>mean (sd) | Number<br>of deaths | % CV<br>deaths | % AC<br>deaths |
|-----------------------------------------------------------|---------|---------------------------|-----------------------|------------------------------|------------------|---------------------|----------------|----------------|
| <b>Fishing and agriculture</b>                            | 3,032   | 20.4                      | 8.4                   | 12.0                         | 43.7 (10.3)      | 114                 | 23.7           | 0.9*           |
| Agriculture, haunting, forestry                           | 2,917   | 20.3                      | 7.9                   | 12.2                         | 43.9 (10.2)      | 113                 | 24.0           | 0.9*           |
| Fishing, fish farming                                     | 115     | 25.2                      | 20.9                  | 6.1                          | 40.1 (10.9)      | 1                   | 0.0            | 0.0            |
| <b>Industry</b>                                           | 19,721  | 13.9                      | 18.9                  | 7.3                          | 39.8 (9.4)       | 423                 | 16.5           | 5.7            |
| Coal mining, oil extraction                               | 964     | 9.2                       | 20.4                  | 4.9                          | 43 (9)           | 19                  | 5.3*           | 0.0            |
| Food industry                                             | 1,797   | 15.2                      | 13.5                  | 9.1                          | 39.4 (9.9)       | 36                  | 25.0*          | 11.1*          |
| Textile, leather industry                                 | 3,553   | 18.7                      | 6.3                   | 9.8                          | 40.1 (10.1)      | 96                  | 16.7           | 4.2*           |
| Wood, wood products industry, publishing                  | 2,313   | 13.1                      | 17.8                  | 4.5                          | 40.2 (9)         | 47                  | 12.8*          | 4.3*           |
| Refinery, pharmaceutical, chemical industry               | 3,360   | 13.0                      | 37.6                  | 7.2                          | 38.6 (8.7)       | 61                  | 21.3           | 9.8*           |
| Non-metal mineral industry                                | 393     | 16.5                      | 13.0                  | 11.2                         | 39.3 (9.7)       | 13                  | 0.0            | 15.4*          |
| Steel industry                                            | 5,137   | 14.0                      | 17.9                  | 7.3                          | 39.5 (9.3)       | 105                 | 15.2           | 3.8*           |
| Furniture industry                                        | 583     | 17.5                      | 10.5                  | 9.3                          | 38.2 (9.6)       | 12                  | 16.7*          | 8.3*           |
| Production, distribution of electricity, water and gas    | 1,621   | 5.6                       | 22.2                  | 3.8                          | 41.6 (8.6)       | 34                  | 20.6*          | 2.9*           |
| <b>Building Constructions</b>                             | 3,612   | 14.3                      | 15.9                  | 4.1                          | 38 (9)           | 74                  | 16.2           | 4.1*           |
| <b>Sales and Transport</b>                                | 51,334  | 14.6                      | 11.9                  | 5.7                          | 38.3 (9.5)       | 980                 | 13.5           | 4.7            |
| Sale, maintenance, repair of motor vehicles, sale of fuel | 3,241   | 14.9                      | 10.9                  | 4.4                          | 38.2 (9.5)       | 68                  | 7.4*           | 5.9*           |
| Wholesale trade, intermediaries of trade                  | 5,755   | 13.3                      | 9.6                   | 5.3                          | 37.7 (9.1)       | 105                 | 16.2           | 5.7*           |
| Retail trade                                              | 16,323  | 15.9                      | 6.8                   | 5.3                          | 37.8 (9.9)       | 317                 | 14.2           | 4.4            |
| Hotels, camping, bars, restaurants                        | 10,361  | 16.8                      | 5.5                   | 8.6                          | 38.4 (9.8)       | 215                 | 15.3           | 5.1            |
| transport                                                 | 15,654  | 12.0                      | 22.6                  | 4.7                          | 39 (9.1)         | 275                 | 11.6           | 4.0            |
| <b>Credit, insurances and other services</b>              | 42,745  | 14.0                      | 25.6                  | 3.9                          | 37.6 (8.8)       | 727                 | 12.2           | 4.5            |
| Credit, insurance, monetary, financial intermediation     | 16,469  | 8.3                       | 23.2                  | 3.6                          | 40.4 (8.8)       | 359                 | 13.1           | 3.1            |
| IT, research, development                                 | 10,517  | 16.5                      | 37.6                  | 3.5                          | 35.2 (7.5)       | 134                 | 8.2            | 6.0*           |
| Professional consulting, real estate, rental              | 15,759  | 18.2                      | 20.1                  | 4.4                          | 36.4 (8.7)       | 234                 | 13.2           | 6.0            |
| <b>Social services</b>                                    | 154,755 | 12.5                      | 33.0                  | 6.3                          | 43.3 (9.3)       | 4,493               | 14.8           | 3.4            |

**Supplementary Table 1. Continued**

|                                           | <b>N</b>     | <b>Contract (%<br/>Temporary)</b> | <b>Education<br/>(% High)</b> | <b>Place of birth<br/>(% Abroad)</b> | <b>Age<br/>mean (sd)</b> | <b>Number<br/>of deaths</b> | <b>% CV<br/>deaths</b> | <b>% AC<br/>deaths</b> |
|-------------------------------------------|--------------|-----------------------------------|-------------------------------|--------------------------------------|--------------------------|-----------------------------|------------------------|------------------------|
| Local, national, public administration    | 54,091       | 5.9                               | 25.3                          | 3.1                                  | 44.3 (8.6)               | 1,676                       | 15.0                   | 4.3                    |
| Public, private education                 | 45,229       | 16.7                              | 50.8                          | 4.6                                  | 45.2 (9.2)               | 1,416                       | 13.4                   | 2.5                    |
| Health, social assistance                 | 31,890       | 11.7                              | 34.2                          | 4.8                                  | 41.3 (9.3)               | 832                         | 14.9                   | 3.7                    |
| Political, trade union organizations      | 3,618        | 12.9                              | 25.4                          | 3.9                                  | 40.9 (9)                 | 87                          | 17.2                   | 1.1*                   |
| Recreational, cultural, sports activities | 5,433        | 31.2                              | 31.9                          | 6.0                                  | 38.8 (9.4)               | 117                         | 9.4                    | 4.3*                   |
| Other service activities                  | 5,473        | 17.3                              | 6.4                           | 5.4                                  | 37.9 (9.9)               | 127                         | 18.1                   | 2.4*                   |
| Domestic services                         | 9,021        | 18.8                              | 5.5                           | 40.4                                 | 42.4 (10.1)              | 238                         | 21.0                   | 3.4*                   |
| <b>International organizations</b>        | <b>1,981</b> | <b>17.6</b>                       | <b>41.5</b>                   | <b>39.0</b>                          | <b>43.6 (9.4)</b>        | <b>35</b>                   | <b>5.7*</b>            | <b>0.0</b>             |

\* Less than 10 deaths

CV cardiovascular

AC accidental

**Table S3. Association between temporary employment and mortality in men and women. Rome 2001-2015**

|                                                                    | Men               |        |      |              |        |      |              |        |      | Women             |        |      |              |        |      |              |        |      |
|--------------------------------------------------------------------|-------------------|--------|------|--------------|--------|------|--------------|--------|------|-------------------|--------|------|--------------|--------|------|--------------|--------|------|
|                                                                    | Overall mortality |        |      | CV mortality |        |      | AC mortality |        |      | Overall mortality |        |      | CV mortality |        |      | AC mortality |        |      |
|                                                                    | HR                | 95% CI |      | HR           | 95% CI |      | HR           | 95% CI |      | HR                | 95% CI |      | HR           | 95% CI |      | HR           | 95% CI |      |
| <b>HR adjusted for age and level of education</b>                  |                   |        |      |              |        |      |              |        |      |                   |        |      |              |        |      |              |        |      |
| Overall                                                            | 1.13              | 1.06   | 1.20 | 1.25         | 1.11   | 1.41 | 1.31         | 1.06   | 1.61 | 1.01              | 0.93   | 1.10 | 0.97         | 0.77   | 1.22 | 1.35         | 0.95   | 1.93 |
| Sector of employment*                                              |                   |        |      |              |        |      |              |        |      |                   |        |      |              |        |      |              |        |      |
| Fishing and agriculture                                            | 0.85              | 0.57   | 1.25 | 1.33         | 0.68   | 2.59 | 1.02         | 0.28   | 3.69 | 0.67              | 0.39   | 1.18 | 0.47         | 0.14   | 1.57 | -            | -      | -    |
| Industry                                                           | 1.21              | 1.02   | 1.42 | 1.11         | 0.80   | 1.54 | 1.61         | 0.98   | 2.64 | 0.98              | 0.71   | 1.36 | 1.52         | 0.76   | 3.05 | 2.19         | 0.80   | 6.02 |
| Building Constructions                                             | 1.23              | 1.03   | 1.46 | 1.22         | 0.87   | 1.70 | 1.21         | 0.69   | 2.14 | 0.91              | 0.37   | 2.22 | 4.79         | 0.83   | 27.5 | -            | -      | -    |
| Sales and Transport                                                | 1.08              | 0.95   | 1.23 | 1.27         | 1.00   | 1.61 | 1.10         | 0.74   | 1.64 | 1.23              | 1.01   | 1.50 | 1.29         | 0.77   | 2.13 | 1.53         | 0.70   | 3.37 |
| Credit, insurances and other services                              | 1.09              | 0.88   | 1.35 | 1.20         | 0.79   | 1.81 | 0.98         | 0.43   | 2.24 | 0.88              | 0.67   | 1.17 | 0.80         | 0.34   | 1.88 | 0.96         | 0.31   | 2.90 |
| Social services                                                    | 1.13              | 1.01   | 1.26 | 1.29         | 1.05   | 1.59 | 1.38         | 0.95   | 2.00 | 0.99              | 0.89   | 1.11 | 0.82         | 0.60   | 1.13 | 1.27         | 0.78   | 2.06 |
| <b>HR adjusted for age, level of education, and place of birth</b> |                   |        |      |              |        |      |              |        |      |                   |        |      |              |        |      |              |        |      |
| Overall                                                            | 1.13              | 1.06   | 1.21 | 1.25         | 1.11   | 1.42 | 1.31         | 1.07   | 1.61 | 1.02              | 0.93   | 1.11 | 0.96         | 0.77   | 1.21 | 1.36         | 0.96   | 1.94 |
| Sector of employment*                                              |                   |        |      |              |        |      |              |        |      |                   |        |      |              |        |      |              |        |      |
| Fishing and agriculture                                            | 0.94              | 0.62   | 1.40 | 1.54         | 0.77   | 3.09 | 1.08         | 0.27   | 4.34 | 0.78              | 0.44   | 1.37 | 0.54         | 0.16   | 1.83 | -            | -      | -    |
| Industry                                                           | 1.21              | 1.03   | 1.43 | 1.09         | 0.78   | 1.52 | 1.65         | 1.00   | 2.72 | 0.98              | 0.71   | 1.37 | 1.51         | 0.73   | 3.11 | 1.95         | 0.69   | 5.57 |
| Building Constructions                                             | 1.22              | 1.02   | 1.46 | 1.20         | 0.85   | 1.69 | 1.26         | 0.71   | 2.24 | 1.12              | 0.42   | 3.01 | 3.95         | 0.58   | 27.1 | -            | -      | -    |
| Sales and Transport                                                | 1.08              | 0.95   | 1.23 | 1.27         | 1.00   | 1.61 | 1.10         | 0.74   | 1.64 | 1.24              | 1.02   | 1.51 | 1.28         | 0.77   | 2.14 | 1.54         | 0.70   | 3.41 |
| Credit, insurances and other services                              | 1.11              | 0.89   | 1.38 | 1.23         | 0.81   | 1.86 | 1.00         | 0.44   | 2.28 | 0.91              | 0.68   | 1.20 | 0.89         | 0.38   | 2.10 | 0.96         | 0.31   | 2.92 |
| Social services                                                    | 1.13              | 1.01   | 1.27 | 1.30         | 1.06   | 1.60 | 1.39         | 0.96   | 2.02 | 0.99              | 0.89   | 1.11 | 0.82         | 0.59   | 1.12 | 1.27         | 0.78   | 2.07 |

CV cardiovascular

AC accidental

\*Sum of macro-sectors differs from the overall population because the international organizations sector, contributing with 94 and 35 deaths for men and women respectively, was not showed.

**Table S4. Association between temporary employment and mortality in men and women. Rome, 2001-2006**

|                                       | N      | Overall mortality |        |      | N      | CV mortality |        |       | N      | AC mortality |        |       |
|---------------------------------------|--------|-------------------|--------|------|--------|--------------|--------|-------|--------|--------------|--------|-------|
|                                       | deaths | HR                | 95% CI |      | deaths | HR           | 95% CI |       | deaths | HR           | 95% CI |       |
| <b>Men</b>                            |        |                   |        |      |        |              |        |       |        |              |        |       |
| Overall                               | 3,657  | 1.13              | 1.00   | 1.28 | 1,003  | 1.31         | 1.04   | 1.65  | 345    | 1.11         | 0.79   | 1.56  |
| Sector of employment*                 |        |                   |        |      |        |              |        |       |        |              |        |       |
| Fishing and agriculture               | 66     | 1.40              | 0.72   | 2.69 | 14     | 3.25         | 1.00   | 10.6  | 6      | 1.12         | 0.13   | 10.03 |
| Industry                              | 477    | 1.18              | 0.85   | 1.63 | 161    | 1.40         | 0.82   | 2.37  | 52     | 1.12         | 0.48   | 2.61  |
| Building Constructions                | 297    | 1.14              | 0.81   | 1.61 | 90     | 1.31         | 0.73   | 2.38  | 36     | 1.13         | 0.46   | 2.75  |
| Sales and Transport                   | 836    | 1.16              | 0.90   | 1.48 | 230    | 1.25         | 0.79   | 2.00  | 91     | 0.90         | 0.47   | 1.75  |
| Credit, insurances and other services | 439    | 1.42              | 0.96   | 2.09 | 110    | 2.07         | 1.03   | 4.14  | 37     | 1.41         | 0.50   | 4.00  |
| Social services                       | 1,517  | 0.92              | 0.73   | 1.17 | 391    | 0.85         | 0.52   | 1.39  | 122    | 1.01         | 0.52   | 1.97  |
| <b>Women</b>                          |        |                   |        |      |        |              |        |       |        |              |        |       |
| Overall                               | 1,638  | 1.01              | 0.84   | 1.20 | 222    | 1.16         | 0.74   | 1.83  | 94     | 1.61         | 0.93   | 2.77  |
| Sector of employment*                 |        |                   |        |      |        |              |        |       |        |              |        |       |
| Fishing and agriculture               | 33     | 0.95              | 0.39   | 2.35 | 5      | -            | -      | -     | 1      | -            | -      | -     |
| Industry                              | 100    | 0.86              | 0.43   | 1.71 | 14     | 1.70         | 0.37   | 7.68  | 12     | 0.70         | 0.09   | 5.52  |
| Building Constructions                | 19     | 1.31              | 0.29   | 5.94 | 2      | 16.8         | 1.03   | 274.5 | -      | -            | -      | -     |
| Sales and Transport                   | 245    | 1.38              | 0.95   | 2.00 | 36     | 1.05         | 0.37   | 3.02  | 14     | 2.31         | 0.63   | 8.43  |
| Credit, insurances and other services | 175    | 0.82              | 0.46   | 1.46 | 20     | 1.84         | 0.51   | 6.63  | 16     | 0.48         | 0.06   | 3.83  |
| Social services                       | 1,060  | 0.93              | 0.73   | 1.18 | 145    | 1.02         | 0.55   | 1.91  | 51     | 1.93         | 0.95   | 3.95  |

HR adjusted for age

CV cardiovascular

AC accidental

\*Sum of macro-sectors differs from the overall population because the international organizations sector, contributing with 94 and 35 deaths for men and women respectively, was not showed.

**Table S5. Association between temporary employment and mortality by sex and type of work, Rome 2001-2015**

|                       | Overall mortality |        |      |        |      | CV mortality |      |        |      | AC mortality |      |        |      |
|-----------------------|-------------------|--------|------|--------|------|--------------|------|--------|------|--------------|------|--------|------|
|                       | N                 | Deaths | HR   | 95% CI |      | Deaths       | HR   | 95% CI |      | Deaths       | HR   | 95% CI |      |
| <b>Men</b>            |                   |        |      |        |      |              |      |        |      |              |      |        |      |
| Overall               | 320,654           | 14,290 | 1.16 | 1.09   | 1.24 | 3,793        | 1.29 | 1.14   | 1.45 | 884          | 1.27 | 1.04   | 1.57 |
| High-skill non manual | 86,759            | 3,826  | 1.05 | 0.92   | 1.20 | 1,019        | 1.34 | 1.06   | 1.70 | 197          | 1.19 | 0.73   | 1.94 |
| Low-skill non manual  | 94,764            | 3,989  | 1.14 | 0.99   | 1.31 | 1,037        | 1.15 | 0.88   | 1.51 | 244          | 1.37 | 0.89   | 2.11 |
| Sales                 | 37,183            | 1,452  | 1.22 | 1.02   | 1.46 | 367          | 1.33 | 0.94   | 1.89 | 115          | 1.75 | 1.07   | 2.87 |
| Manual                | 86,555            | 4,646  | 1.16 | 1.05   | 1.28 | 1,273        | 1.24 | 1.03   | 1.50 | 296          | 1.22 | 0.88   | 1.69 |
| <b>Women</b>          |                   |        |      |        |      |              |      |        |      |              |      |        |      |
| Overall               | 277,180           | 6,846  | 1.03 | 0.95   | 1.12 | 997          | 1.02 | 0.81   | 1.28 | 262          | 1.34 | 0.94   | 1.91 |
| High-skill non manual | 61,000            | 1,502  | 0.97 | 0.80   | 1.19 | 188          | 1.22 | 0.72   | 2.10 | 45           | 1.72 | 0.75   | 3.97 |
| Low-skill non manual  | 142,773           | 3,358  | 1.07 | 0.94   | 1.22 | 455          | 0.82 | 0.55   | 1.24 | 127          | 1.04 | 0.57   | 1.87 |
| Sales                 | 35,679            | 757    | 1.03 | 0.82   | 1.30 | 124          | 0.97 | 0.54   | 1.72 | 41           | 1.75 | 0.82   | 3.75 |
| Manual                | 37,668            | 1,228  | 0.95 | 0.80   | 1.13 | 230          | 1.04 | 0.70   | 1.54 | 49           | 1.28 | 0.62   | 2.65 |

HR adjusted for age

CV cardiovascular

AC accidental
